# Supplementary material for: LnIII–CoII heterometallic chains based on pyridine substituted nitronyl nitroxides
Source: Royal Society of Chemistry journal article supplement (doi:10.1039/c6nj03849b), 2017-01-01
Supplement: c6nj03849b1.pdf [file c6nj03849b1.pdf]

## Supporting Information

### **Ln<sup>III</sup>-Co<sup>II</sup> heterometallic chains based on pyridine substituted nitronyl nitroxides**

Xiufeng Wang, Hongdao Li, Juan Sun, Meng Yang, Cun Li, Licun Li\*

*Department of Chemistry, Key Laboratory of Advanced Energy Materials Chemistry and Tianjin Key Laboratory of Metal and Molecule-based Material Chemistry, Nankai University, Tianjin 300071, China*

Table S1 Selected bond lengths [Å] and angles [°] for complexes **1** and **2**.

| <b>1 Y</b>        |            | <b>2 Gd</b>       |           |
|-------------------|------------|-------------------|-----------|
| Y(1)-O(9)         | 2.300(4)   | Gd(1)-O(9)        | 2.318(5)  |
| Y(1)-O(4)         | 2.319(4)   | Gd(1)-O(4)        | 2.393(6)  |
| Y(1)-O(7)         | 2.338(4)   | Gd(1)-O(7)        | 2.364(5)  |
| Y(1)-O(2)#1       | 2.347(4)   | Gd(1)-O(2)        | 2.371(5)  |
| Y(1)-O(6)         | 2.341(4)   | Gd(1)-O(6)        | 2.371(5)  |
| Y(1)-O(5)         | 2.375(4)   | Gd(1)-O(5)        | 2.368(5)  |
| Y(1)-O(8)         | 2.369(4)   | Gd(1)-O(8)        | 2.381(6)  |
| Y(1)-O(3)         | 2.379(4)   | Gd(1)-O(3)        | 2.343(4)  |
| Co(1)-O(12)       | 2.100(4)   | Co(1)-O(12)       | 2.054(5)  |
| Co(1)-O(11)       | 2.074(4)   | Co(1)-O(11)       | 2.081(5)  |
| Co(1)-O(13)       | 2.071(4)   | Co(1)-O(13)       | 2.046(5)  |
| Co(1)-O(14)       | 2.060(4)   | Co(1)-O(14)       | 2.062(5)  |
| Co(1)-N(1)        | 2.166(5)   | Co(1)-N(1)#1      | 2.132(5)  |
| Co(1)-N(6)        | 2.159(5)   | Co(1)-N(6)        | 2.171(5)  |
| O(1)-N(2)         | 1.280(7)   | O(1)-N(2)         | 1.263(7)  |
| O(2)-N(3)         | 1.308(6)   | O(2)-N(3)         | 1.298(7)  |
| O(9)-N(4)         | 1.296(6)   | O(9)-N(4)         | 1.287(7)  |
| O(10)-N(5)        | 1.292(6)   | O(10)-N(5)        | 1.273(6)  |
| O(4)-Y(1)-O(3)    | 72.65(15)  | O(4)-Gd(1)-O(3)   | 71.88(18) |
| O(6)-Y(1)-O(5)    | 74.36(14)  | O(6)-Gd(1)-O(5)   | 73.83(18) |
| O(7)-Y(1)-O(8)    | 71.87(15)  | O(7)-Gd(1)-O(8)   | 71.1(2)   |
| O(9)-Y(1)-O(2)#1  | 137.04(15) | O(9)-Gd(1)-O(2)   | 138.7(2)  |
| O(12)-Co(1)-O(11) | 88.40(16)  | O(12)-Co(1)-O(11) | 88.26(19) |
| O(13)-Co(1)-O(14) | 88.45(16)  | O(13)-Co(1)-O(14) | 88.99(19) |
| N(1)-Co(1)-N(6)   | 179.6(2)   | N(1)#1-Co(1)-N(6) | 179.1(2)  |
| N(4)-O(9)-Y(1)    | 157.9(4)   | N(4)-O(9)-Gd(1)   | 160.2(5)  |
| N(3)-O(2)-Y(1)#2  | 135.8(3)   | N(3)-O(2)-Gd(1)   | 138.4(5)  |

Symmetry transformations used to generate equivalent atoms: #1 x + 1, y - 1, z; #2 x - 1, y + 1, z for **1** and **2**

Table S2 Selected bond lengths [Å] and angles [°] for complexes **3** and **4**.

| <b>3</b> Dy       |          | <b>4</b> Dy       |           |
|-------------------|----------|-------------------|-----------|
| Dy(1)-O(9)        | 2.312(5) | Dy(1)-O(9)        | 2.336(7)  |
| Dy(1)-O(4)        | 2.381(7) | Dy(1)-O(4)        | 2.365(7)  |
| Dy(1)-O(7)        | 2.342(6) | Dy(1)-O(7)        | 2.391(6)  |
| Dy(1)-O(2)        | 2.342(6) | Dy(1)-O(2)#1      | 2.339(6)  |
| Dy(1)-O(6)        | 2.346(6) | Dy(1)-O(6)        | 2.350(7)  |
| Dy(1)-O(5)        | 2.357(6) | Dy(1)-O(5)        | 2.377(7)  |
| Dy(1)-O(8)        | 2.364(6) | Dy(1)-O(8)        | 2.353(6)  |
| Dy(1)-O(3)        | 2.327(6) | Dy(1)-O(3)        | 2.300(6)  |
| Co(1)-O(12)       | 2.041(6) | Co(1)-O(12)       | 2.016(8)  |
| Co(1)-O(11)       | 2.082(5) | Co(1)-O(11)       | 2.074(7)  |
| Co(1)-O(13)       | 2.051(6) | Co(1)-O(13)       | 2.065(9)  |
| Co(1)-O(14)       | 2.061(5) | Co(1)-O(14)       | 2.078(9)  |
| Co(1)-N(1)#1      | 2.138(6) | Co(1)-N(1)        | 2.093(9)  |
| Co(1)-N(6)        | 2.175(6) | Co(1)-N(6)        | 2.151(8)  |
| O(1)-N(2)         | 1.250(9) | O(1)-N(2)         | 1.280(10) |
| O(9)-N(4)         | 1.281(8) | O(9)-N(4)         | 1.300(9)  |
| O(10)-N(5)        | 1.284(8) | O(10)-N(5)        | 1.274(10) |
| O(2)-N(3)         | 1.329(9) | O(2)-N(3)         | 1.311(9)  |
| O(3)-Dy(1)-O(4)   | 72.3(2)  | O(3)-Dy(1)-O(4)   | 73.8(2)   |
| O(6)-Dy(1)-O(5)   | 74.3(2)  | O(6)-Dy(1)-O(5)   | 73.2(2)   |
| O(7)-Dy(1)-O(8)   | 71.9(2)  | O(8)-Dy(1)-O(7)   | 72.2(2)   |
| O(9)-Dy(1)-O(2)   | 138.2(2) | O(9)-Dy(1)-O(2)#1 | 139.4(2)  |
| O(12)-Co(1)-O(11) | 88.6(2)  | O(12)-Co(1)-O(11) | 88.9(3)   |
| O(13)-Co(1)-O(14) | 89.1(2)  | O(13)-Co(1)-O(14) | 88.8(4)   |
| N(1)#1-Co(1)-N(6) | 179.1(3) | N(1)-Co(1)-N(6)   | 93.8(3)   |
| N(4)-O(9)-Dy(1)   | 160.0(5) | N(4)-O(9)-Dy(1)   | 139.1(6)  |
| N(3)-O(2)-Dy(1)   | 137.7(6) | N(3)-O(2)-Dy(1)#2 | 136.3(5)  |

Symmetry transformations used to generate equivalent atoms: #1  $x + 1, y - 1, z$ ; #2  $x - 1, y + 1, z$  for **3**; #1  $-x + 1, y + 1/2, -z - 1/2$ ; #2  $-x + 1, y - 1/2, -z - 1/2$  for **4**

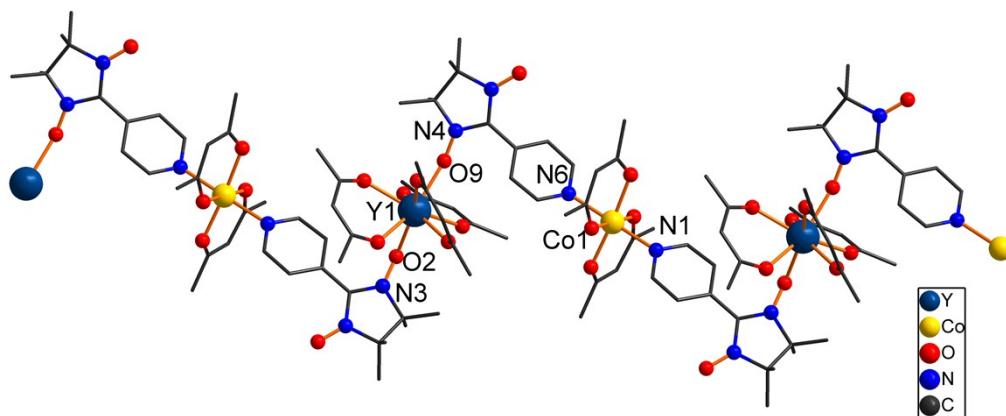

**Figure S1.** Crystal structure of complex **1** with the atom-labeling. All of the hydrogen and fluorine atoms and hexane solvent molecules are omitted for clarity.

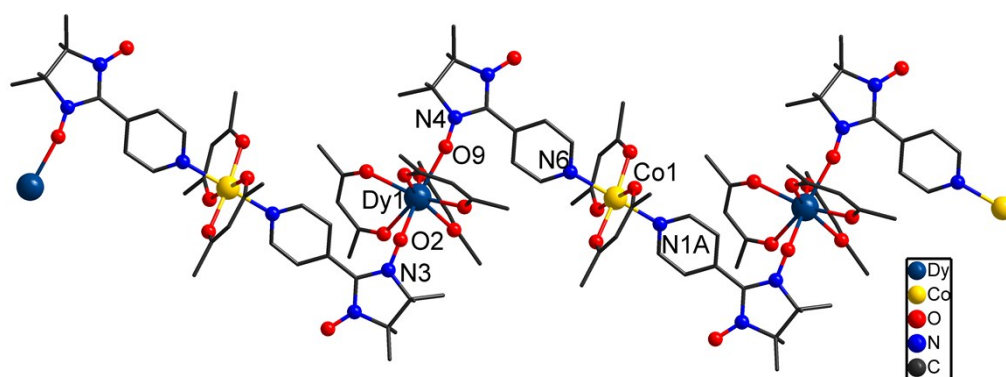

**Figure S2.** Crystal structure of complex **3** with the atom-labeling. All of the hydrogen and fluorine atoms and hexane solvent molecules are omitted for clarity.

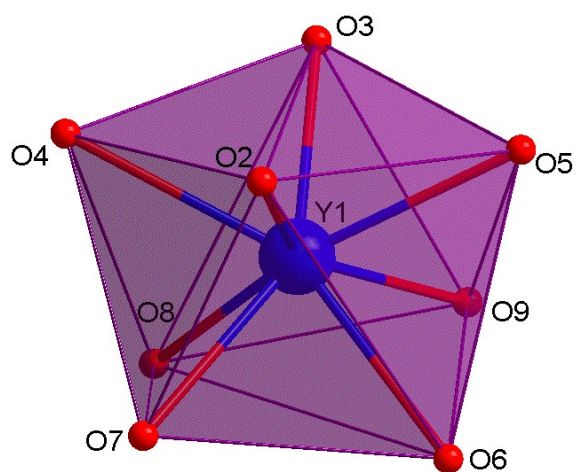

**Figure S3.** The coordination polyhedron of the Y ion in complex **1**.

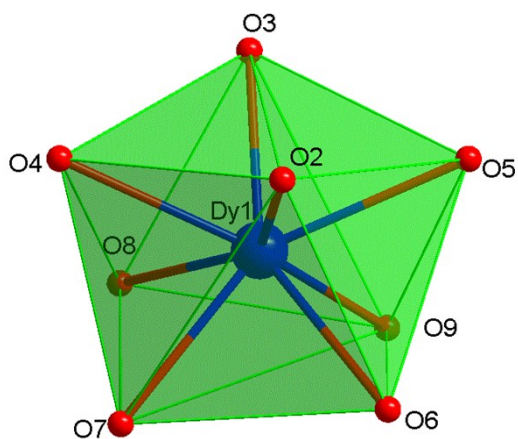

**Figure S4.** The coordination polyhedron of the Dy ion in complex 3.

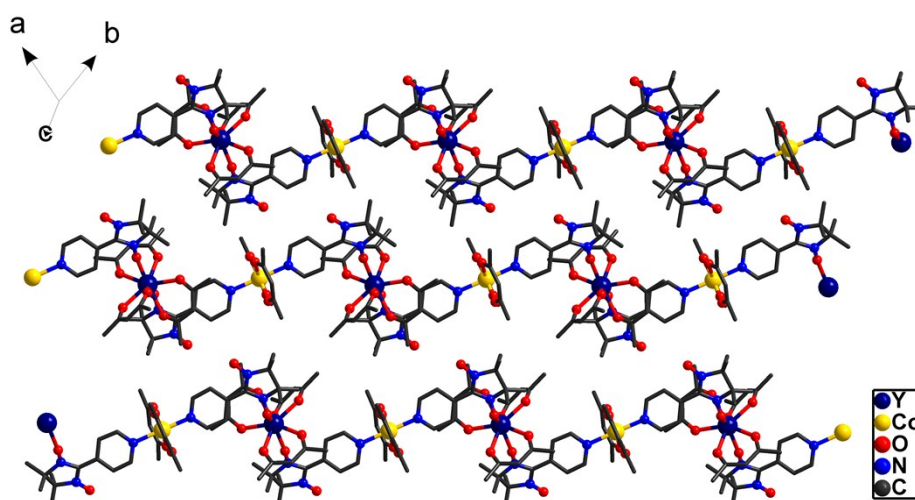

**Figure S5.** Packing of the chains in crystal for complex 1. All of the hydrogen and fluorine atoms and hexane solvent molecules are omitted for clarity.

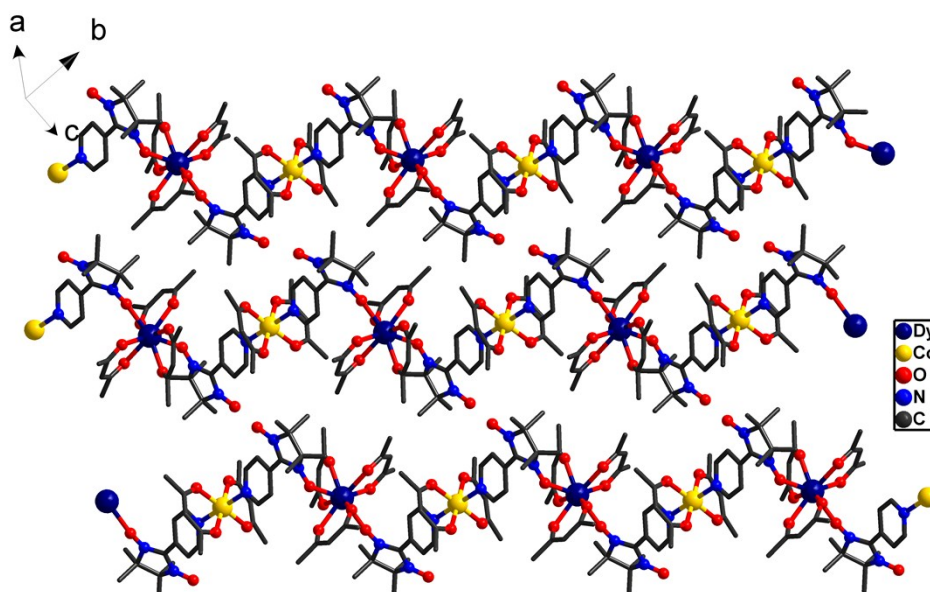

**Figure S6.** Packing of the chains in crystal for complex 3. All of the hydrogen and fluorine atoms and hexane solvent molecules are omitted for clarity.

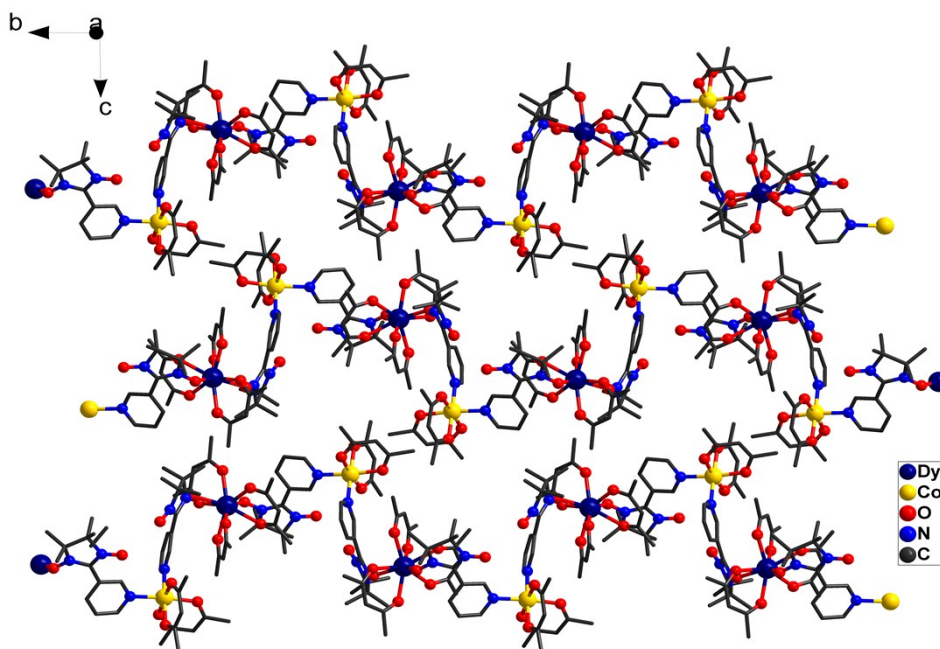

**Figure S7.** Packing of the chains in crystal for complex 4. All of the hydrogen, fluorine atoms and solvent molecules are omitted for clarity.

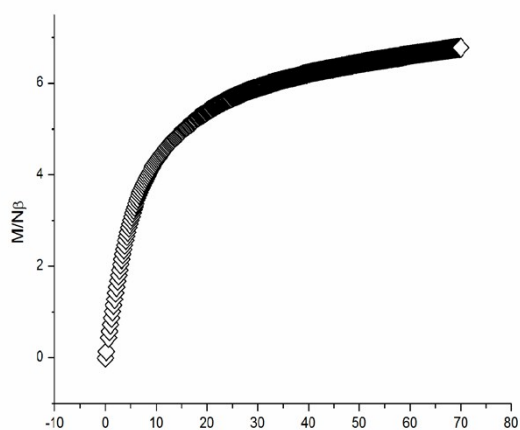

**Figure S8**  $M$  versus  $H$  plot of complex 3 at 2.0K.

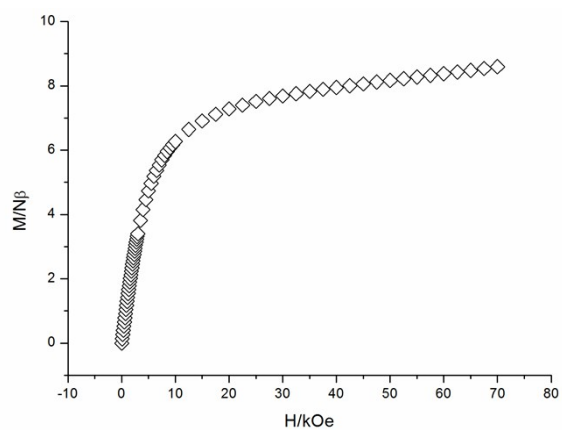

**Figure S9**  $M$  versus  $H$  plot of complex 4 at 2.0K.

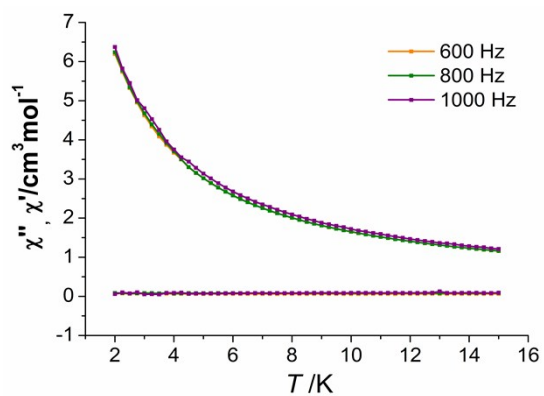

**Figure S10** Temperature dependence of the in-phase and out-of-phase components of the ac magnetic susceptibilities for **3** in zero dc field.

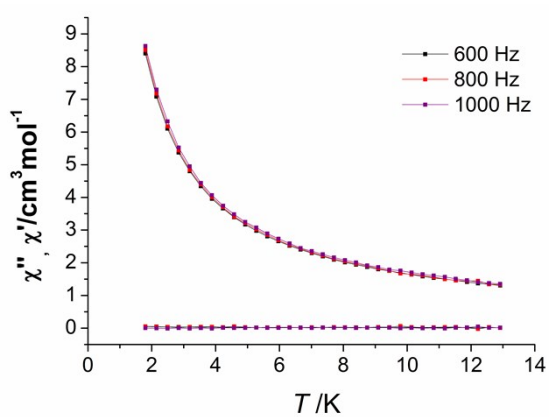

**Figure S11** Temperature dependence of the in-phase and out-of-phase components of the ac magnetic susceptibilities for **4** in zero dc field.

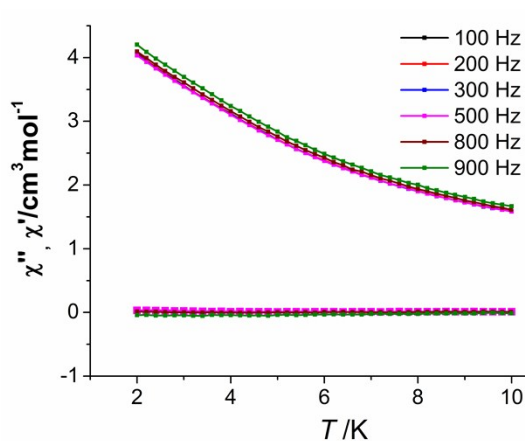

**Figure S12** Temperature dependence of the in-phase and out-of-phase components of the ac magnetic susceptibilities for **3** in 3 kOe dc field.

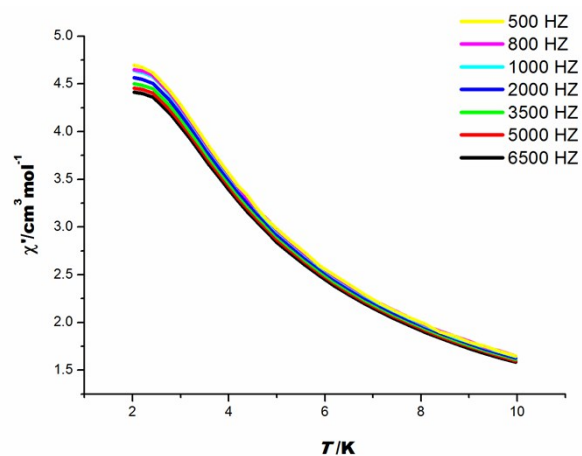

**Figure S13** Temperature dependence of the in-phase components of the ac magnetic susceptibilities for **4** in 2kOe dc field.

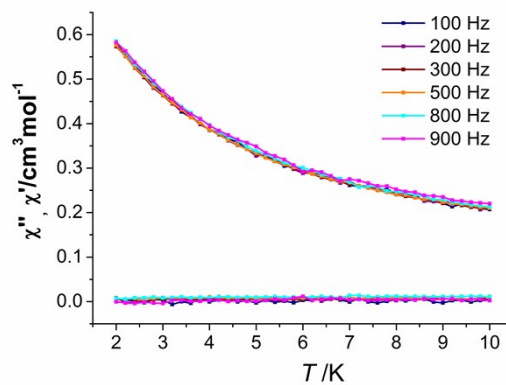

**Figure S14** Temperature dependence of the in-phase and out-of-phase components of the ac magnetic susceptibilities for **1** in 2 kOe dc field.
